# Supplementary material
Source: PubMed Central journal article supplement (PMC5882509)
Supplement: NIHMS940389-supplement-1.pdf [file NIHMS940389-supplement-1.pdf]

## **Supplementary Material for**

### **Combined BRAF, EGFR, and MEK Inhibition in Patients with *BRAF*<sup>V600E</sup>-Mutant Colorectal Cancer**

Ryan B. Corcoran, Thierry André, Chloe E. Atreya, Jan H.M. Schellens, Takayuki Yoshino, Johanna C. Bendell, Antoine Hollebecque, Autumn J. McRee, Salvatore Siena, Gary Middleton, Kei Muro, Michael S. Gordon, Josep Tabernero, Rona Yaeger, Peter J. O'Dwyer, Yves Humblet, Filip De Vos, A. Scott Jung, Jan C. Brase, Savina Jaeger, Severine Bettinger, Bijoyesh Mookerjee, Fatima Rangwala, Eric Van Cutsem

**Supplementary Tables S1 – S2**

**Supplementary Figures S1 – S4**

## Corcoran et al, Supplementary Table S1. AE summary

| AE, n (%)                              | D + T + P <sup>a</sup><br>(n = 91) | D + T + P <sup>b</sup><br>Part 2B<br>4.8 mg/kg P<br>(n = 32) | D + T + P <sup>c</sup><br>Part 2B<br>6 mg/kg P<br>(n = 24) | T + P<br>(n = 51) | D + P<br>(n = 20) |
|----------------------------------------|------------------------------------|--------------------------------------------------------------|------------------------------------------------------------|-------------------|-------------------|
| Any AE                                 | 91 (100)                           | 32 (100)                                                     | 24 (100)                                                   | 50 (98)           | 20 (100)          |
| Suspected to be drug related           | 90 (99)                            | 32 (100)                                                     | 23 (96)                                                    | 49 (96)           | 20 (100)          |
| SAEs                                   | 46 (51)                            | 15 (47)                                                      | 16 (67)                                                    | 23 (45)           | 6 (30)            |
| Suspected to be drug related           | 28 (31)                            | 9 (28)                                                       | 10 (42)                                                    | 12 (24)           | 5 (25)            |
| Fatal SAEs <sup>d</sup>                | 2 (2)                              | 0                                                            | 0                                                          | 0                 | 0                 |
| AEs leading to discontinuation         | 16 (18)                            | 4 (13)                                                       | 7 (29)                                                     | 8 (16)            | 1 (5)             |
| AEs leading to dose reduction          | 49 (54)                            | 16 (50)                                                      | 12 (50)                                                    | 27 (53)           | 5 (25)            |
| AEs leading to dose interruption/delay | 65 (71)                            | 26 (81)                                                      | 16 (67)                                                    | 37 (73)           | 9 (45)            |

<sup>a</sup> Includes all patients who were treated with triple combination of dabrafenib, trametinib, and panitumumab, which included varying doses of trametinib and panitumumab.

<sup>b</sup> Includes patients who received dabrafenib 150 mg twice daily, trametinib 2 mg once daily, and panitumumab 4.8 mg/kg once every other week in the expansion phase of the trial.

<sup>c</sup> Includes patients who received dabrafenib 150 mg twice daily, trametinib 2 mg once daily, and panitumumab 6 mg/kg once every other week in the expansion phase of the trial.

<sup>d</sup> No fatal SAEs were suspected to be drug related.

**Corcoran et al, Supplemental Table S2. Common AEs by dose for the D + T + P arm (≥20%)**

| AE, n (%)            | D + T + P<br>(n = 91) |           | D + T + P<br>Part 2B 4.8 mg/kg P<br>(n = 32) |           | D + T + P<br>Part 2B 6 mg/kg P<br>(n = 24) |           |
|----------------------|-----------------------|-----------|----------------------------------------------|-----------|--------------------------------------------|-----------|
|                      | Total                 | Grade 3/4 | Total                                        | Grade 3/4 | Total                                      | Grade 3/4 |
| Any AE               | 91 (100)              | 64 (70)   | 32 (100)                                     | 20 (63)   | 24 (100)                                   | 19 (79)   |
| Anemia               | 19 (21)               | 5 (5)     | 4 (13)                                       | 0         | 4 (17)                                     | 2 (8)     |
| Decreased appetite   | 36 (40)               | 2 (2)     | 13 (41)                                      | 0         | 8 (33)                                     | 0         |
| Dermatitis acneiform | 54 (59)               | 9 (10)    | 21 (66)                                      | 4 (13)    | 13 (54)                                    | 2 (8)     |
| Diarrhea             | 59 (65)               | 6 (7)     | 18 (56)                                      | 2 (6)     | 14 (58)                                    | 1 (4)     |
| Dry skin             | 49 (54)               | 2 (2)     | 16 (50)                                      | 0         | 15 (63)                                    | 1 (4)     |
| Dysgeusia            | 18 (20)               | 0         | 6 (19)                                       | 0         | 2 (8)                                      | 0         |
| Fatigue              | 45 (49)               | 6 (7)     | 17 (53)                                      | 2 (6)     | 10 (42)                                    | 2 (8)     |
| Hypomagnesemia       | 26 (29)               | 1 (1)     | 7 (22)                                       | 0         | 5 (21)                                     | 0         |
| Nausea               | 51 (56)               | 2 (2)     | 21 (66)                                      | 1 (3)     | 12 (50)                                    | 0         |
| Edema peripheral     | 22 (24)               | 0         | 7 (22)                                       | 0         | 6 (25)                                     | 0         |
| Paronychia           | 21 (23)               | 1 (1)     | 10 (31)                                      | 0         | 3 (13)                                     | 0         |
| Pyrexia              | 44 (48)               | 4 (4)     | 15 (47)                                      | 1 (3)     | 12 (50)                                    | 3 (13)    |
| Rash                 | 28 (31)               | 10 (11)   | 9 (28)                                       | 3 (9)     | 6 (25)                                     | 4 (17)    |
| Skin fissures        | 20 (22)               | 1 (1)     | 7 (22)                                       | 0         | 4 (17)                                     | 0         |
| Vomiting             | 39 (43)               | 2 (2)     | 15 (47)                                      | 0         | 8 (33)                                     | 0         |



Corcoran et al, Supplemental Figure S2. Analysis of pS6 by treatment arm

A

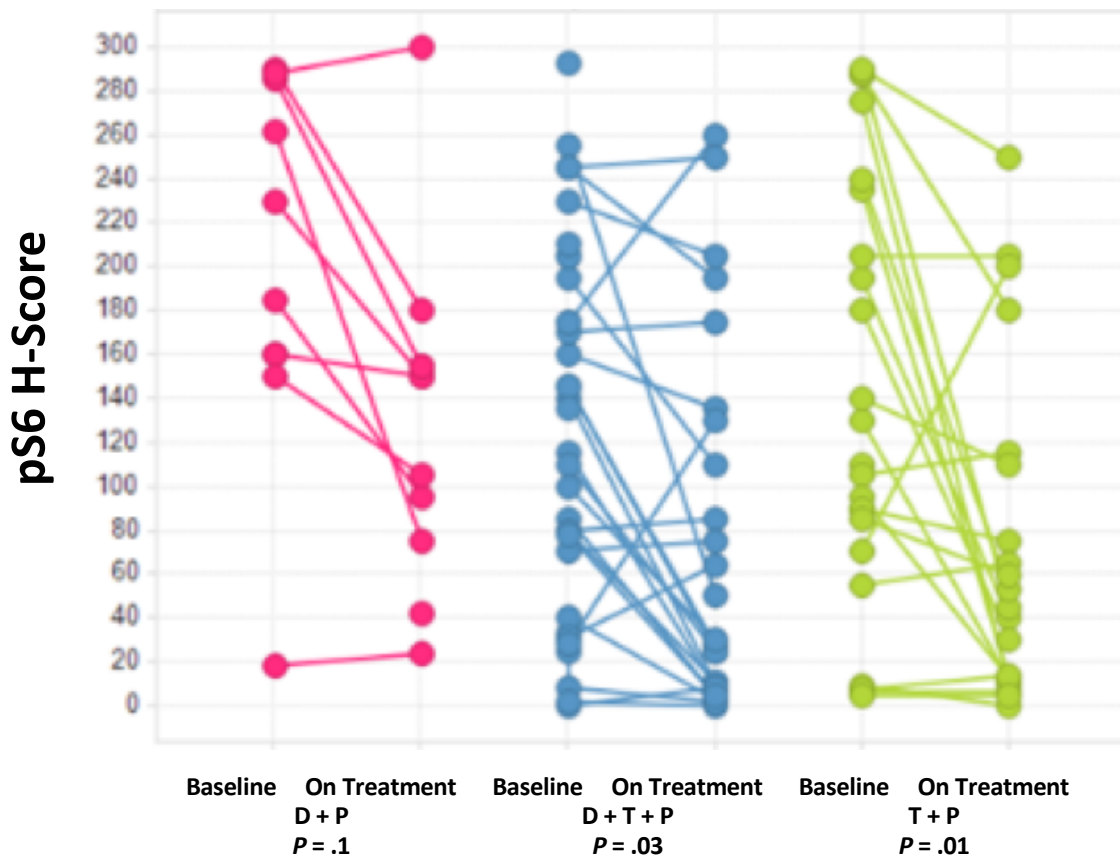

B

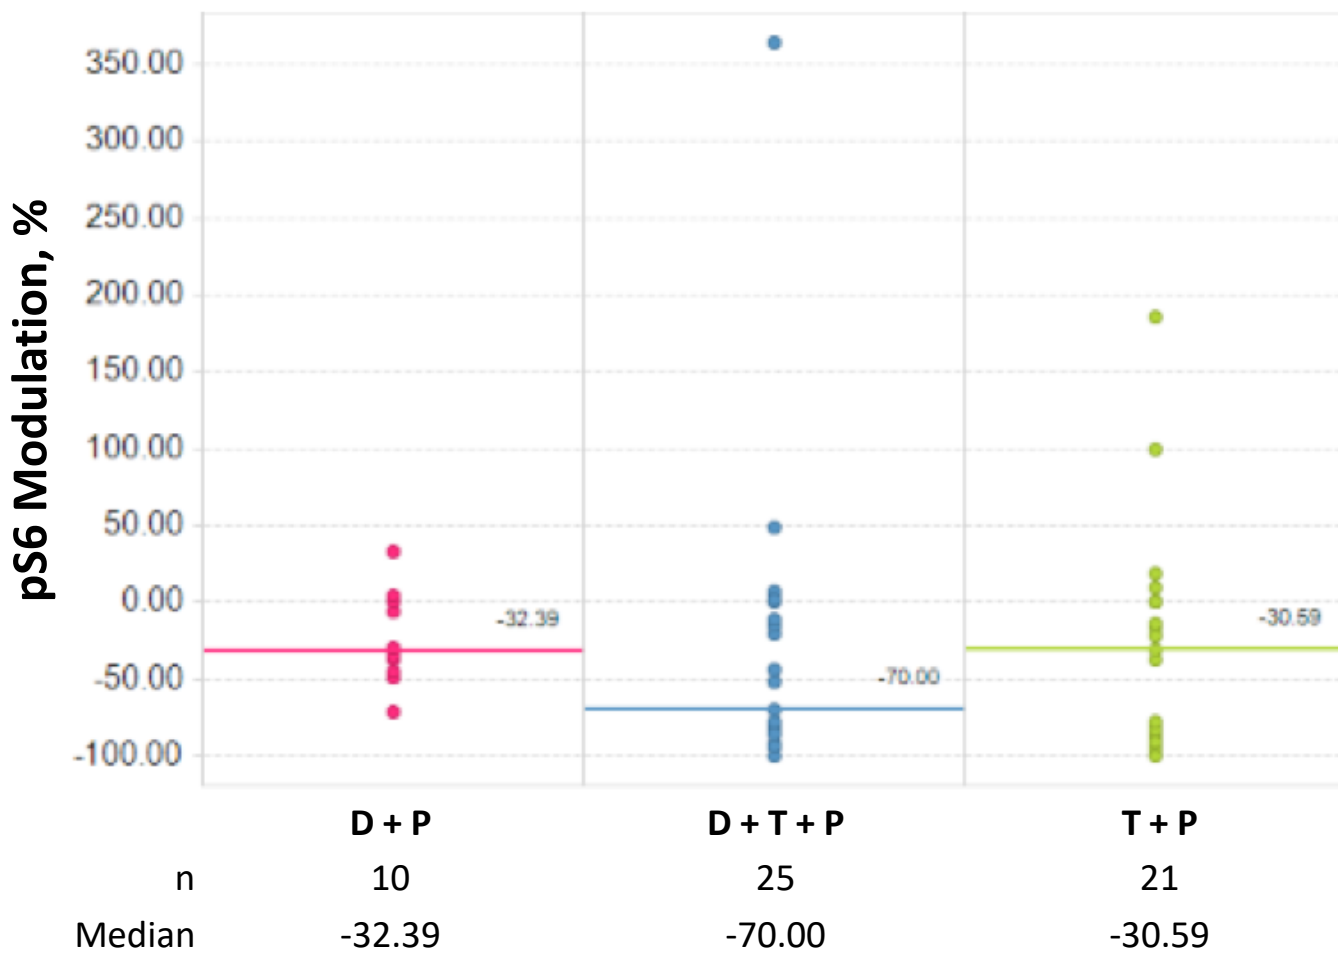

Corcoran et al, Supplemental Figure S3. Forest plot of response rate for D + T + P

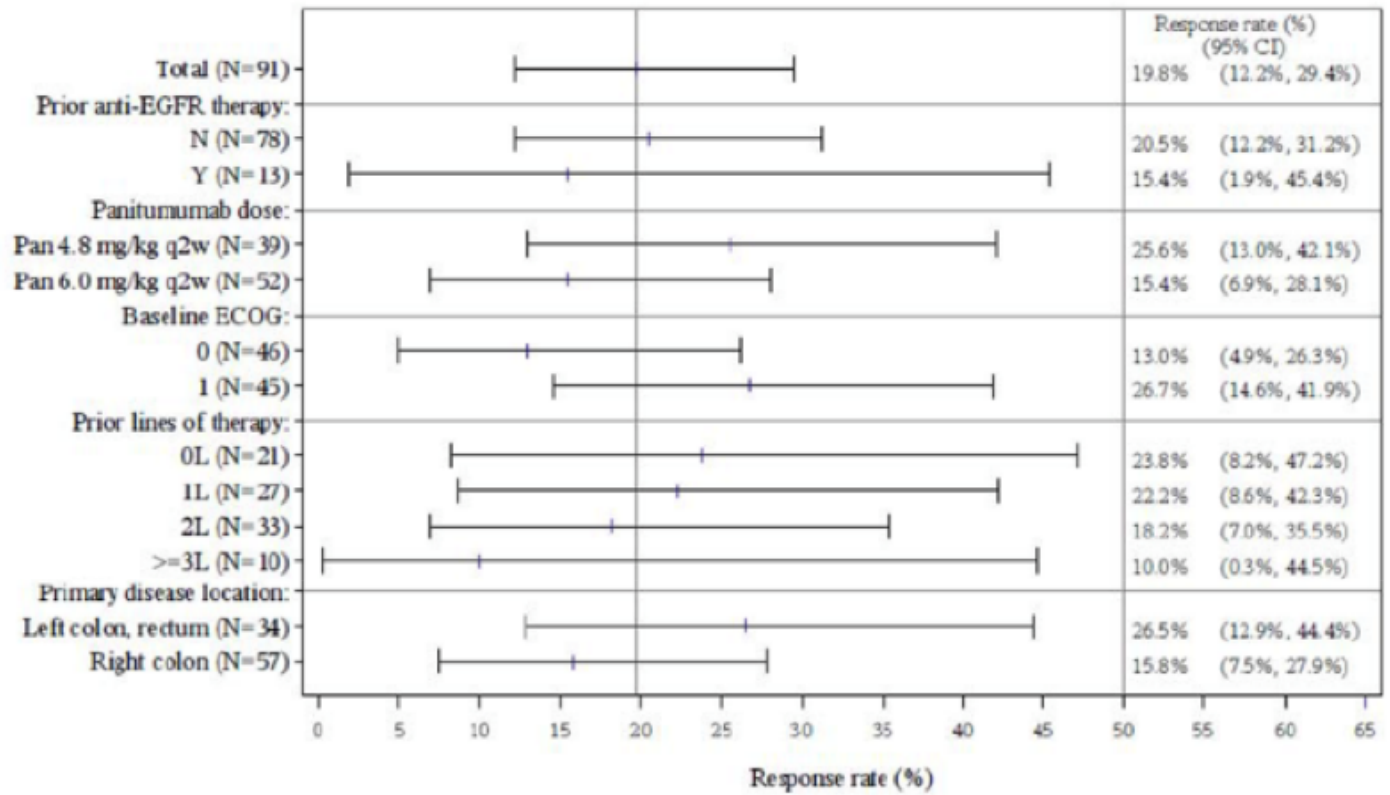

**Corcoran et al, Supplemental Figure S4. Efficacy by MSI status: focus on D + T + P arm (n = 78 with known MMR status and evaluable survival data)**

**A**

|           | MSI-high/dMMR<br>n (%) | MSS/pMMR <sup>a</sup><br>n (%) |
|-----------|------------------------|--------------------------------|
| D + P     | 2 (13)                 | 13 (87)                        |
| D + T + P | 11 (14)                | 67 (86)                        |
| T + P     | 3 (12)                 | 22 (88)                        |
| Total     | 16 (14)                | 102 (86)                       |

<sup>a</sup>For the subset of patients with insufficient normal DNA available, immunohistochemistry was performed for the following markers: MLH1, MSH2, MSH6, and PMS2. Positive staining for all 4 markers was required for the tumor to be classified as MSS, otherwise the tumor was classified as MSI.

**B**

| Assessment                          | D + T + P<br>MSI-high/dMMR<br>(n = 11) | D + T + P<br>MSS/pMMR<br>(n = 67) |
|-------------------------------------|----------------------------------------|-----------------------------------|
| Best response, n (%)                |                                        |                                   |
| CR                                  | 1 (9)                                  | 0                                 |
| PR                                  | 4 (36)                                 | 18 (27)                           |
| Stable disease                      | 5 (46)                                 | 37 (55)                           |
| Non-CR/non-progressive disease (NE) | 1 (9)                                  | 4 (6)                             |
| Progressive disease                 | 0                                      | 8 (12)                            |
| Response rate, n (%)                |                                        |                                   |
| CR + PR                             | 5 (46)                                 | 18 (27)                           |
| 95% CI                              | 17-77                                  | 17-39                             |

Corcoran et al, Supplemental Figure S4. Efficacy by MSI status: focus on D + T + P arm (n = 78 with known MMR status and evaluable survival data)

C

### Progression-free survival

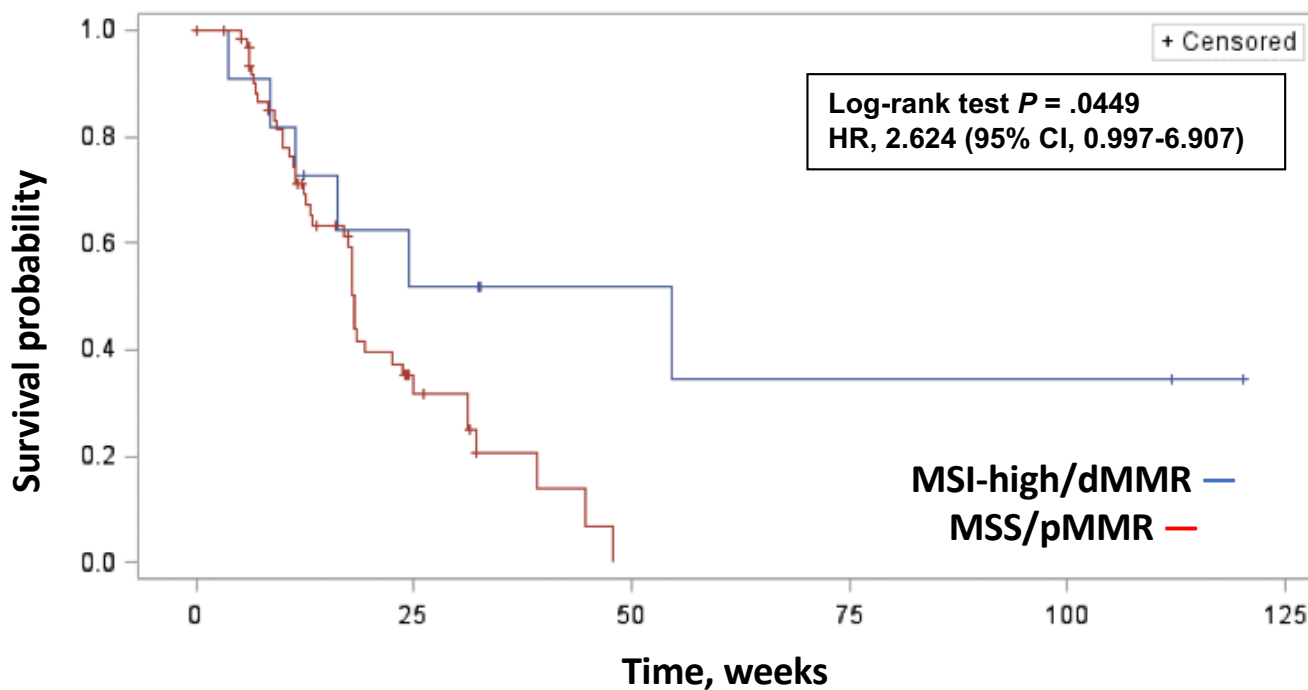

|               |    |    |    |    |   |   |   |   |   |   |   |   |   |   |   |
|---------------|----|----|----|----|---|---|---|---|---|---|---|---|---|---|---|
| MSI-high/dMMR | 11 | 10 | 7  | 6  | 5 | 3 | 3 | 2 | 2 | 2 | 2 | 2 | 2 | 2 | 1 |
| MSS/pMMR      | 67 | 51 | 32 | 15 | 6 | 2 | 0 |   |   |   |   |   |   |   |   |
